# Supplementary material for: Ccr2 deficiency impairs microglial accumulation and accelerates progression of Alzheimer-like disease
Source: Springer Nature journal article supplement (doi:10.1038/nm1555), 2007-03-11
Supplement: 41591_2007_BFnm1555_MOESM31_ESM.pdf [file 41591_2007_BFnm1555_MOESM31_ESM.pdf]

***APP* mouse 710 d**

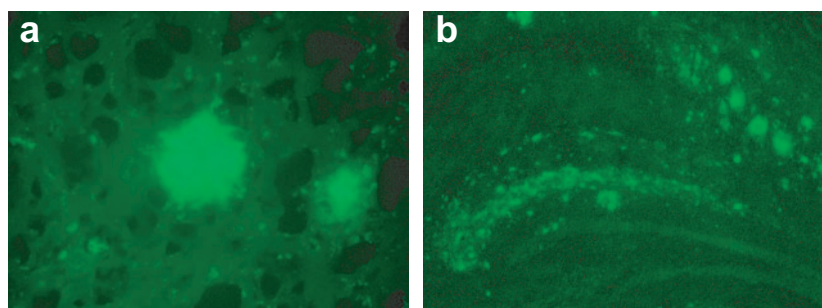

**"Classic" senile plaque Florid plaque deposition**

**Supplementary Figure 1:** Florid A $\beta$  deposition and senile plaque formation in aged *APP* mice. Brain sections from a 710-day old *APP* mouse were stained with anti-A $\beta$  antibodies. a. 400X magnification showing a compact senile-like plaque. b. 100X magnification showing florid plaque formation.
