# Supplementary material for: Ccr2 deficiency impairs microglial accumulation and accelerates progression of Alzheimer-like disease
Source: Springer Nature journal article supplement (doi:10.1038/nm1555), 2007-03-11
Supplement: 41591_2007_BFnm1555_MOESM32_ESM.pdf [file 41591_2007_BFnm1555_MOESM32_ESM.pdf]

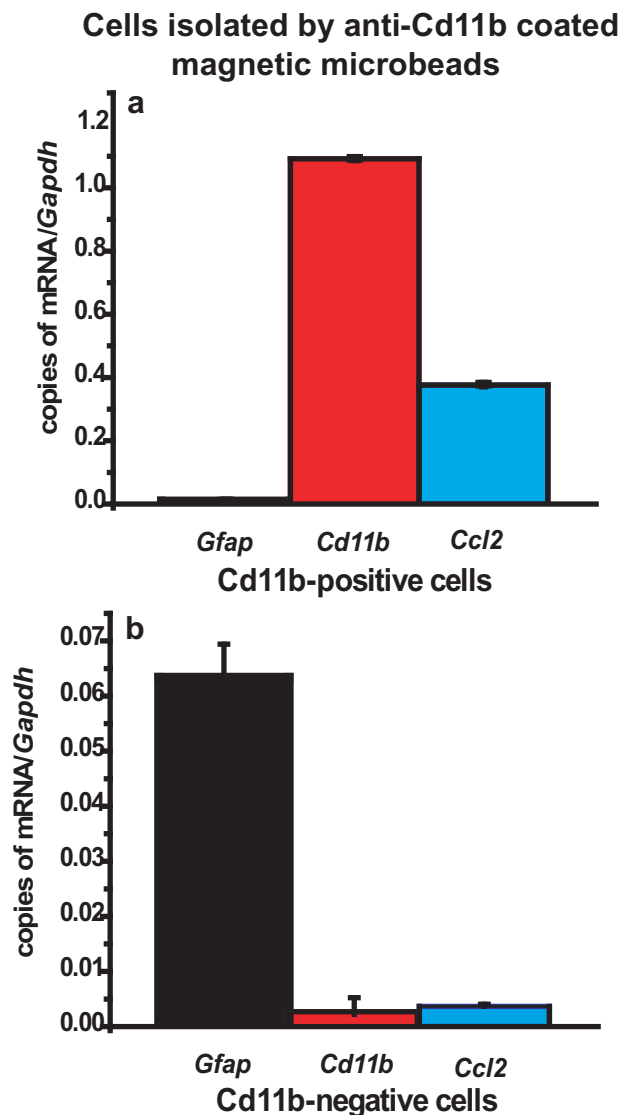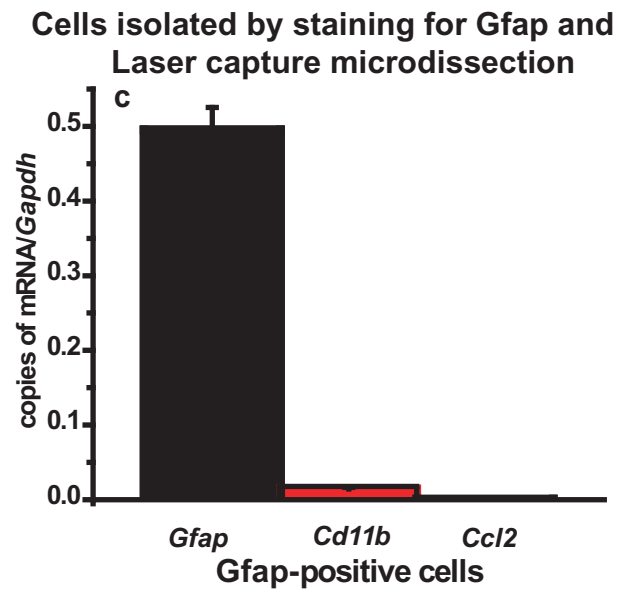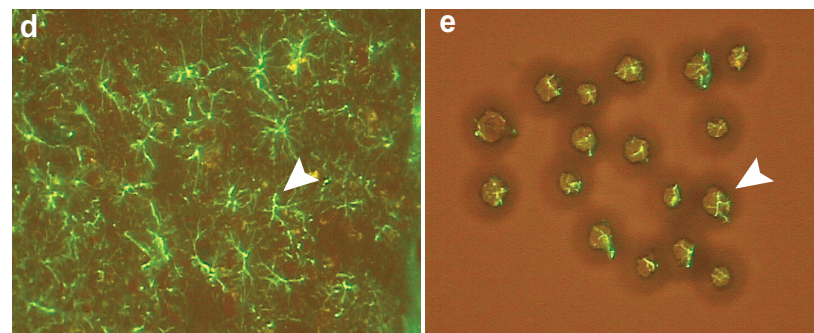

**Supplementary Figure 2: *Ccl2* is produced in *Cd11b*-positive cells in *APP* mice but not in *Gfap*-positive cells.** Fresh mixed brain cells from *APP* mice were collected and incubated with anti-mouse *Cd11b*-coated magnetic beads (Miltenyi Biotec, Auburn, CA). *Cd11b*-positive cells (i.e. cells that bound the beads-microglia/mononuclear phagocytes) were separated from *Cd11b*-negative cells (i.e. cells that did not bind the beads-astrocytes and neurons) using a magnet. mRNA was isolated from *Cd11b*-positive and *Cd11b*-negative cells and used for measurement of *Gfap*, *Cd11b* and *Ccl2* expression by Q-PCR. **a.** *Cd11b*-positive cells expressed high levels of *Ccl2* and *Cd11b*, but low levels of *Gfap*. **b.** *Cd11b*-negative cells expressed low levels of *Ccl2* and *Cd11b*, but high levels of *Gfap*. These data indicate that microglia/mononuclear phagocytes but not astrocytes are the likely source of *Ccl2* in this *APP* mouse model of AD.

To further confirm that astrocytes from *APP* mice do not express *Ccl2*, we stained fresh sections of *APP* brains with anti-*Gfap* antibodies and isolated *Gfap*-positive cells (astrocytes) by laser capture microdissection (LCM), using a Veritas (Arcturus) LCM apparatus. **c.** *Gfap*-positive cells did not express *Ccl2* or *Cd11b*, but expressed high levels of *Gfap*, as expected. **d.** Astrocytes stained brightly with anti-*Gfap* antibodies in *APP* brain slices. **e.** Individual astrocytes harvested on an LCM cap. The arrowhead points to the same cell in situ (**d**) and after capture (**e**). The data shown are from representative experiments, each experiment was repeated twice with similar results.
