# Supplementary material for: Ccr2 deficiency impairs microglial accumulation and accelerates progression of Alzheimer-like disease
Source: Springer Nature journal article supplement (doi:10.1038/nm1555), 2007-03-11
Supplement: 41591_2007_BFnm1555_MOESM33_ESM.pdf [file 41591_2007_BFnm1555_MOESM33_ESM.pdf]

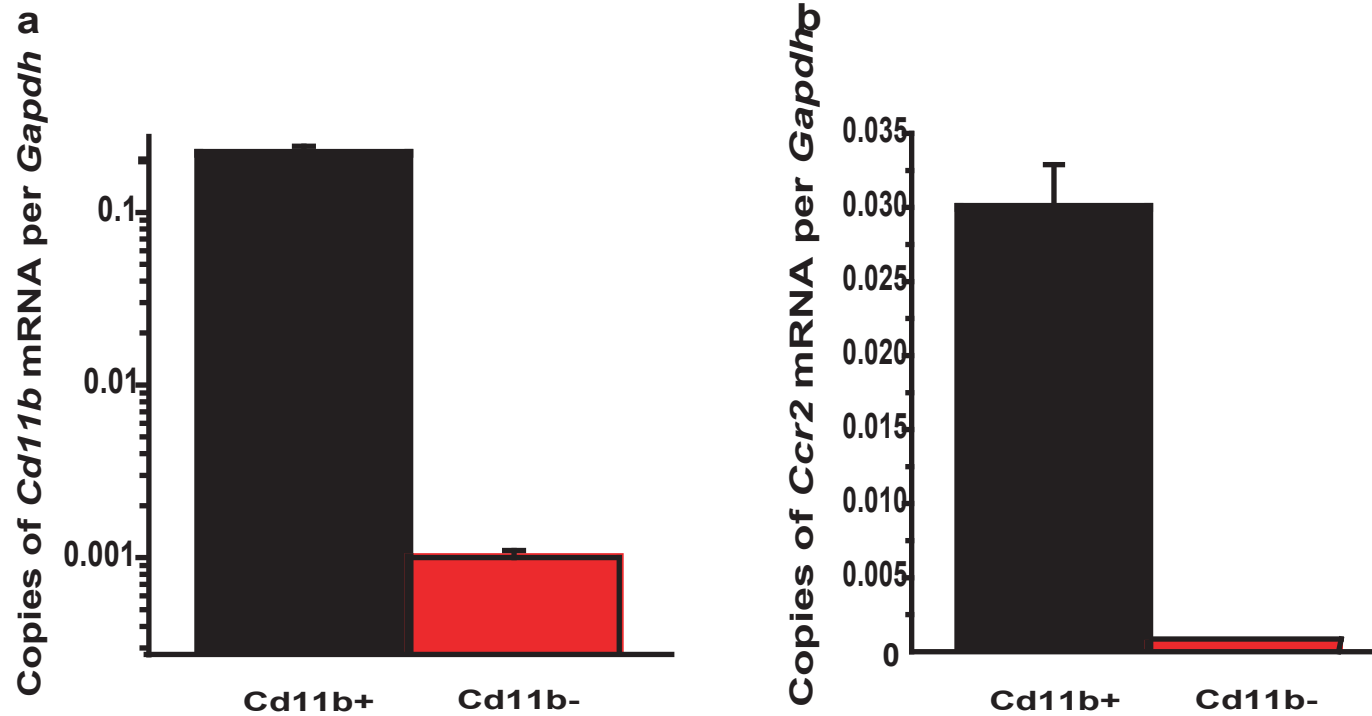

**Supplementary Figure 3: Expression of *Ccr2* correlates with *Cd11b* expression in brain cells.** Fresh mixed brain cells from WT mice were collected and incubated with anti-mouse Cd11b-coated magnetic beads (Miltenyi Biotec, Auburn, CA) and processed according to the manufacturer's instructions. mRNA was isolated from cells that bound the beads (Cd11b-positive) and cells that did not bind the beads (Cd11b-negative), and used for measurement of *Cd11b* and *Ccr2* expression by Q-PCR. **a.** Cd11b-positive cells (but not Cd11b-negative cells) expressed high levels of *Cd11b* transcripts as expected. **b.** Cd11b-positive cells expressed high levels of *Ccr2*, whereas Cd11b-negative cells expressed low levels of *Ccr2*.
