# Supplementary material for: Ccr2 deficiency impairs microglial accumulation and accelerates progression of Alzheimer-like disease
Source: Springer Nature journal article supplement (doi:10.1038/nm1555), 2007-03-11
Supplement: 41591_2007_BFnm1555_MOESM34_ESM.pdf [file 41591_2007_BFnm1555_MOESM34_ESM.pdf]

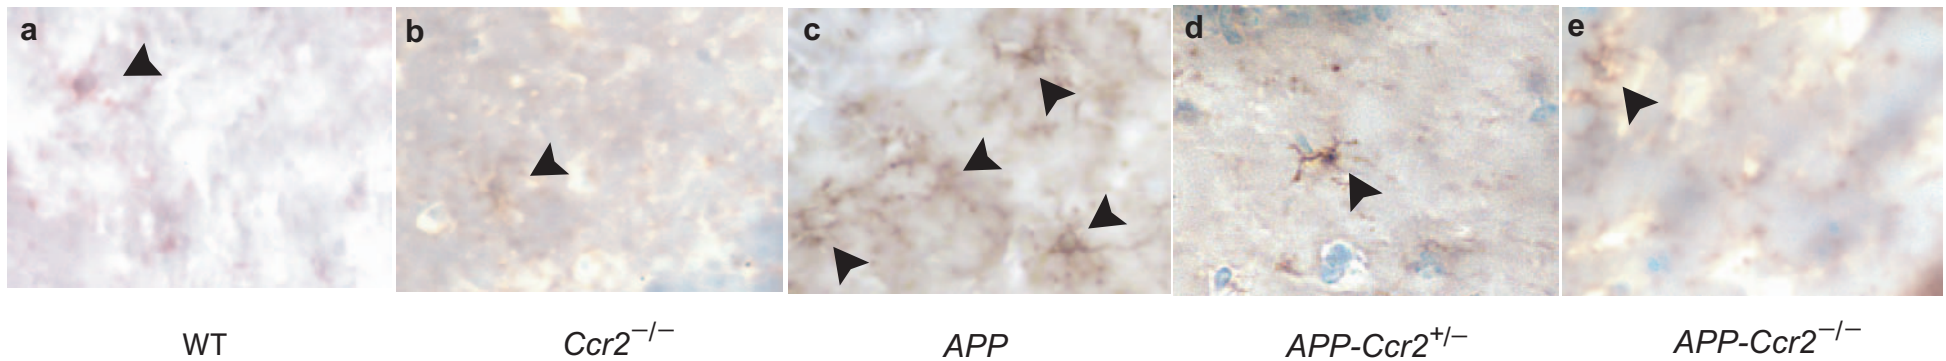

**Supplementary Figure 4: Absence of microglial accumulation in 65-day old  $Ccr2$  deficient *APP* mice.** Immunohistochemistry staining for microglia using HRP-coupled IB4. **a.** WT. **b.**  $Ccr2^{-/-}$ . **c.** *APP*. **d.** *APP-Ccr2<sup>+/-</sup>*. **e.** *APP-Ccr2<sup>-/-</sup>* brain sections. These data show increased microglial staining in 65-day old *APP* mice but not in age-matched *APP-Ccr2<sup>+/-</sup>* and *APP-Ccr2<sup>-/-</sup>* brains. Control sections were stained in the absence of IB4 and showed no background staining (not shown). These data confirm the results obtained by immunohistochemistry with anti-Cd11b antibodies and flow cytometry with anti-Cd11b and anti-Cd45 antibodies (Fig. 3, 4). Each section is representative from n= 3 mice/genotype. original magnification 400x.
