# Supplementary material for: Ccr2 deficiency impairs microglial accumulation and accelerates progression of Alzheimer-like disease
Source: Springer Nature journal article supplement (doi:10.1038/nm1555), 2007-03-11
Supplement: 41591_2007_BFnm1555_MOESM35_ESM.pdf [file 41591_2007_BFnm1555_MOESM35_ESM.pdf]

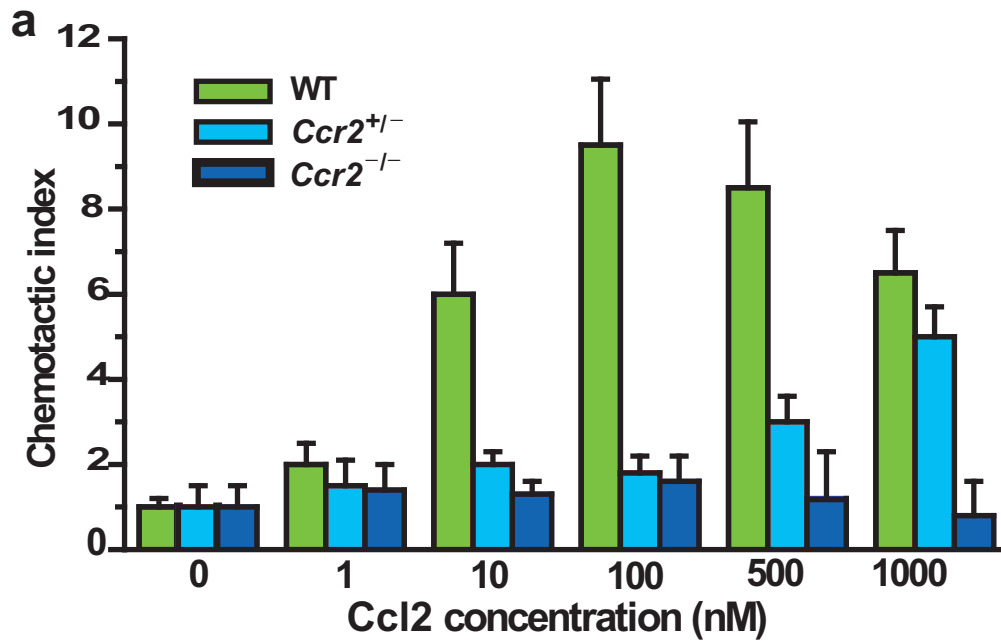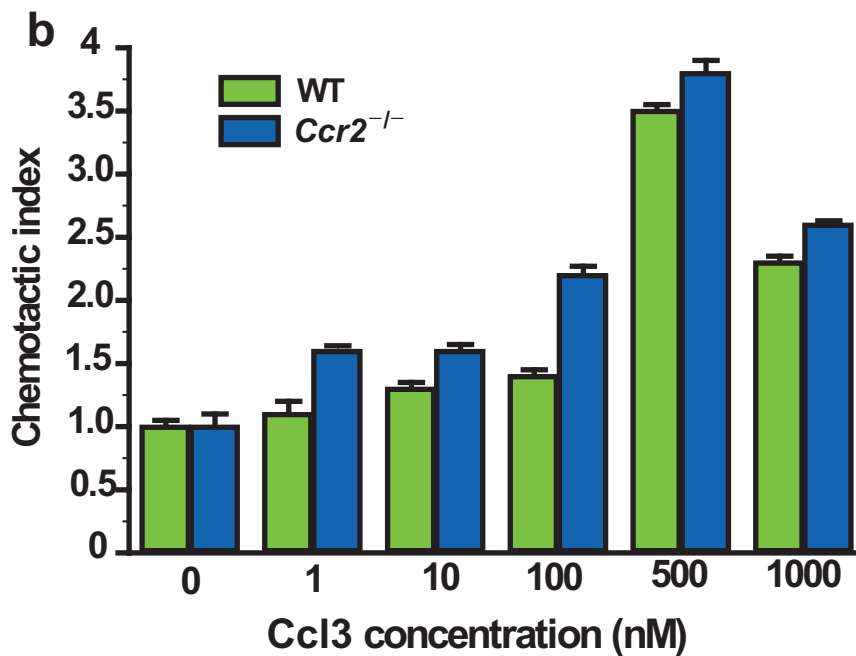

**Supplementary Figure 5: Migration of resident peritoneal macrophages from *Ccr2*<sup>+/-</sup>, *Ccr2*<sup>-/-</sup> and WT mice to Ccl2 and Ccl3. a. *Ccr2*<sup>-/-</sup> macrophages do not migrate in response to Ccl2, in contrast to WT macrophages. *Ccr2*<sup>+/-</sup> macrophages have an intermediate phenotype with a dose-response curve that is shifted to the right. b. *Ccr2*<sup>-/-</sup> and WT macrophages migrate equally to Ccl3, a Ccr1 and Ccr5 ligand.**
