# Supplementary material for: Ccr2 deficiency impairs microglial accumulation and accelerates progression of Alzheimer-like disease
Source: Springer Nature journal article supplement (doi:10.1038/nm1555), 2007-03-11
Supplement: 41591_2007_BFnm1555_MOESM36_ESM.pdf [file 41591_2007_BFnm1555_MOESM36_ESM.pdf]

**Supplementary table 1** Sequences of primers used for Q-PCR.

| <b>Gene name</b>                      | <b>Forward Primer</b>  | <b>Reverse Primer</b> |
|---------------------------------------|------------------------|-----------------------|
| <i>Nepriylsin</i>                     | GCAGCCTCAGCCGAAACTAC   | CACCGTCTCCATGTTGCAGT  |
| <i>Insulysin</i>                      | GAAGACAAACGGGAATACCGTG | CCGCTGAGGACTTGTCTGTG  |
| <i><math>\beta</math>-secretase 1</i> | CAGTGGGACCACCAACCTTC   | GCTGCCTTGATGGACTTGAC  |
| <i>Presenilin-1</i>                   | GGTGGCTGTTTTATGTCCCAA  | CAACCACACCATTGTTGAGGA |
| <i>ApoE</i>                           | CTGACAGGATGCCTAGCCG    | CGCAGGTAATCCCAGAAGC   |
| <i>APP</i>                            | CGAGAGGTGTGCTCTGAACAAG | GGGCACACTTCCCTTCAGTC  |
